# Supplementary material for: Perpetration and Victimization in Offline and Cyber Contexts: A Variable- and Person-Oriented Examination of Associations and Differences Regarding Domain-Specific Self-Esteem and School Adjustment
Source: MDPI journal article supplement (doi:10.3390/ijerph181910429), 2021-10-03
Supplement: s1 [file s1]

Supplemental Material

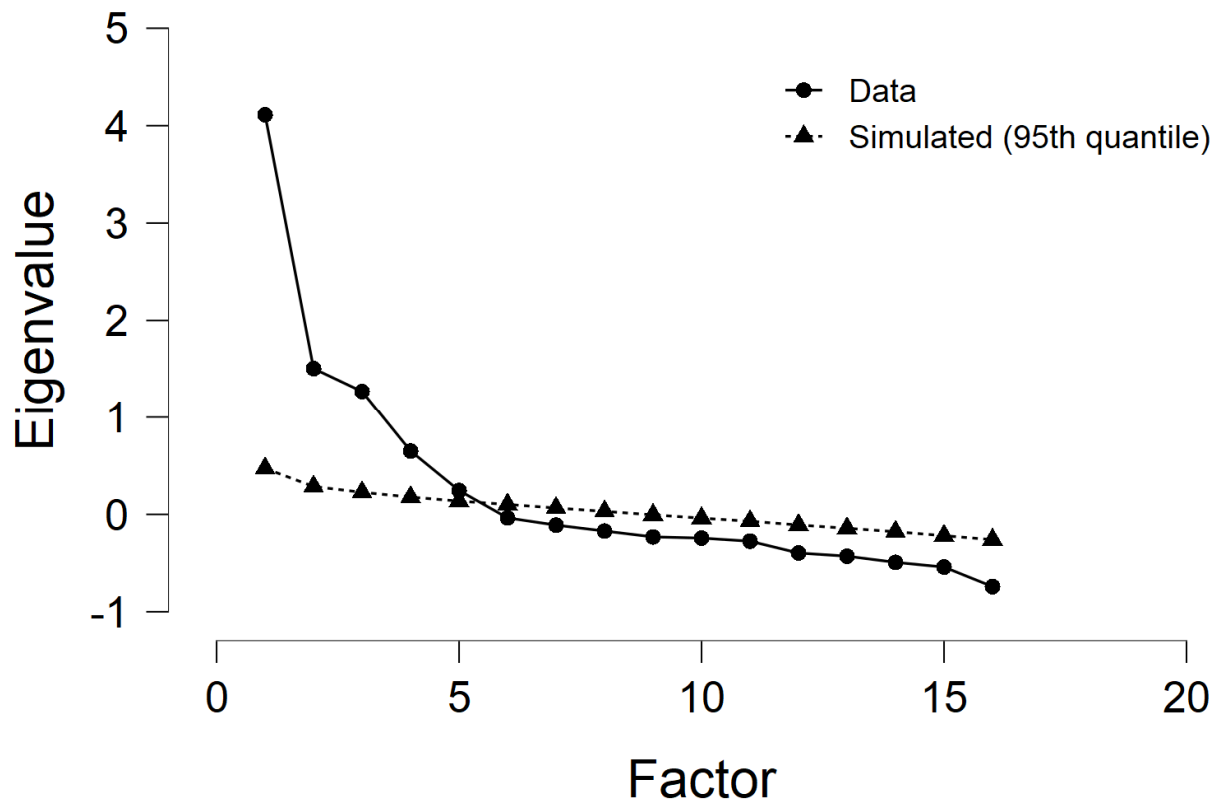

Figure S1. Scree Plot of Empirical Eigenvalues Against the 95th Quantile of Simulated Eigenvalues.

Supplementary Table S1. Unstandardized Parameters of the Mediation Model.

| Predictors            | Outcome               | Estimate         | SE    | z      | p       | 95% CI |        |
|-----------------------|-----------------------|------------------|-------|--------|---------|--------|--------|
|                       |                       |                  |       |        |         | Lower  | Upper  |
| school adjustment     | offline victimization | <b>-0.465**</b>  | 0.149 | -3.129 | 0.002   | -0.757 | -0.174 |
| school adjustment     | offline perpetration  | 0.195            | 0.211 | 0.925  | 0.355   | -0.218 | 0.608  |
| school adjustment     | cyber victimization   | 0.144            | 0.225 | 0.640  | 0.522   | -0.297 | 0.585  |
| school adjustment     | cyber perpetration    | -0.670           | 0.474 | -1.412 | 0.158   | -1.600 | 0.260  |
| school adjustment     | school performance SE | <b>0.247***</b>  | 0.074 | 3.342  | < 0.001 | 0.102  | 0.392  |
| school adjustment     | body related SE       | 0.065            | 0.058 | 1.128  | 0.259   | -0.048 | 0.178  |
| school adjustment     | social SE             | <b>0.573***</b>  | 0.085 | 6.710  | < 0.001 | 0.406  | 0.741  |
| school adjustment     | creative-artistic SE  | -0.069           | 0.055 | -1.262 | 0.207   | -0.177 | 0.038  |
| school adjustment     | emotional SE          | <b>0.579***</b>  | 0.087 | 6.676  | < 0.001 | 0.409  | 0.749  |
| offline victimization | school performance SE | <b>0.175***</b>  | 0.040 | 4.353  | < 0.001 | 0.096  | 0.254  |
| offline victimization | body related SE       | -0.070           | 0.040 | -1.729 | 0.084   | -0.148 | 0.009  |
| offline victimization | social SE             | <b>-0.328***</b> | 0.048 | -6.810 | < 0.001 | -0.423 | -0.234 |
| offline victimization | creative-artistic SE  | 0.025            | 0.036 | 0.683  | 0.494   | -0.046 | 0.095  |
| offline victimization | emotional SE          | -0.090           | 0.049 | -1.828 | 0.067   | -0.187 | 0.006  |
| offline perpetration  | school performance SE | -0.079           | 0.046 | -1.724 | 0.085   | -0.168 | 0.011  |
| offline perpetration  | body related SE       | 0.006            | 0.037 | 0.157  | 0.876   | -0.067 | 0.079  |
| offline perpetration  | social SE             | -0.008           | 0.033 | -0.253 | 0.800   | -0.073 | 0.056  |
| offline perpetration  | creative-artistic SE  | 0.030            | 0.024 | 1.244  | 0.214   | -0.018 | 0.078  |
| offline perpetration  | emotional SE          | -0.029           | 0.035 | -0.811 | 0.418   | -0.098 | 0.041  |
| cyber victimization   | school performance SE | <b>0.054*</b>    | 0.025 | 2.187  | 0.029   | 0.006  | 0.102  |
| cyber victimization   | body related SE       | 0.011            | 0.027 | 0.407  | 0.684   | -0.041 | 0.063  |
| cyber victimization   | social SE             | <b>-0.155***</b> | 0.029 | -5.280 | < 0.001 | -0.213 | -0.097 |
| cyber victimization   | creative-artistic SE  | -0.0001524       | 0.022 | -0.007 | 0.994   | -0.043 | 0.043  |
| cyber victimization   | emotional SE          | -0.043           | 0.029 | -1.453 | 0.146   | -0.100 | 0.015  |

|                       |                       |                |       |        |       |        |       |
|-----------------------|-----------------------|----------------|-------|--------|-------|--------|-------|
| cyber perpetration    | school performance SE | -0.065         | 0.038 | -1.703 | 0.088 | -0.139 | 0.010 |
| cyber perpetration    | body related SE       | 0.036          | 0.031 | 1.159  | 0.246 | -0.025 | 0.096 |
| cyber perpetration    | social SE             | -0.004         | 0.019 | -0.207 | 0.836 | -0.042 | 0.034 |
| cyber perpetration    | creative-artistic SE  | -0.011         | 0.018 | -0.594 | 0.553 | -0.047 | 0.025 |
| cyber perpetration    | emotional SE          | -0.029         | 0.023 | -1.274 | 0.203 | -0.073 | 0.016 |
| school performance SE | gender                | -0.231         | 0.179 | -1.286 | 0.199 | -0.582 | 0.121 |
| school performance SE | age                   | -0.031         | 0.033 | -0.946 | 0.344 | -0.095 | 0.033 |
| body related SE       | gender                | -0.070         | 0.189 | -0.373 | 0.709 | -0.440 | 0.299 |
| body related SE       | age                   | 0.038          | 0.037 | 1.023  | 0.306 | -0.035 | 0.111 |
| social SE             | gender                | 0.112          | 0.167 | 0.669  | 0.503 | -0.216 | 0.440 |
| social SE             | age                   | 0.017          | 0.034 | 0.510  | 0.610 | -0.050 | 0.085 |
| creative-artistic SE  | gender                | -0.295         | 0.205 | -1.434 | 0.152 | -0.697 | 0.108 |
| creative-artistic SE  | age                   | 0.010          | 0.036 | 0.289  | 0.773 | -0.060 | 0.080 |
| emotional SE          | gender                | <b>0.390*</b>  | 0.169 | 2.309  | 0.021 | 0.059  | 0.720 |
| emotional SE          | age                   | 0.025          | 0.035 | 0.702  | 0.482 | -0.044 | 0.093 |
| offline victimization | gender                | 0.126          | 0.088 | 1.436  | 0.151 | -0.046 | 0.297 |
| offline victimization | age                   | 0.017          | 0.017 | 1.038  | 0.299 | -0.015 | 0.050 |
| offline perpetration  | gender                | <b>0.220**</b> | 0.072 | 3.042  | 0.002 | 0.078  | 0.361 |
| offline perpetration  | age                   | 0.002          | 0.010 | 0.191  | 0.849 | -0.018 | 0.022 |
| cyber victimization   | gender                | 0.036          | 0.054 | 0.658  | 0.510 | -0.070 | 0.142 |
| cyber victimization   | age                   | -0.0002317     | 0.010 | -0.023 | 0.982 | -0.020 | 0.019 |
| cyber perpetration    | gender                | 0.060          | 0.035 | 1.712  | 0.087 | -0.009 | 0.128 |
| cyber perpetration    | age                   | 0.004          | 0.004 | 1.003  | 0.316 | -0.004 | 0.012 |
| school adjustment     | gender                | 0.231          | 0.133 | 1.739  | 0.082 | -0.029 | 0.491 |
| school adjustment     | age                   | -0.045         | 0.025 | -1.762 | 0.078 | -0.094 | 0.005 |

Note. SE = "self-esteem". Robust standard errors, robust confidence intervals, full information maximum likelihood estimator. Significant values are displayed in bold. \*  $p \leq 0.05$ , \*\*  $p \leq 0.01$ , \*\*\*  $p \leq 0.001$ .

**Supplementary Table S2.** Unstandardized Total, Direct, Total Indirect and Indirect Effects of the Mediation Model.

| Predictors             | Mediator              | Outcome           | Estimate | SE    | z      | p       | 95% CI  |        |
|------------------------|-----------------------|-------------------|----------|-------|--------|---------|---------|--------|
|                        |                       |                   |          |       |        |         | Lower   | Upper  |
| Total effects          |                       |                   |          |       |        |         |         |        |
| school performance SE  | —                     | school adjustment | 0.201**  | 0.073 | 2.753  | 0.006   | 0.058   | 0.345  |
| body related SE        | —                     | school adjustment | 0.076    | 0.063 | 1.210  | 0.226   | −0.047  | 0.200  |
| social SE              | —                     | school adjustment | 0.705*** | 0.077 | 9.184  | ≤ 0.001 | 0.554   | 0.855  |
| creative–artistic SE   | —                     | school adjustment | −0.068   | 0.057 | −1.196 | 0.232   | −0.179  | 0.043  |
| emotional SE           | —                     | school adjustment | 0.629*** | 0.091 | 6.879  | ≤ 0.001 | 0.449   | 0.808  |
| Direct effects         |                       |                   |          |       |        |         |         |        |
| school performance SE  | —                     | school adjustment | 0.247*** | 0.074 | 3.342  | ≤ 0.001 | 0.102   | 0.392  |
| body related SE        | —                     | school adjustment | 0.065    | 0.058 | 1.128  | 0.259   | −0.048  | 0.178  |
| social SE              | —                     | school adjustment | 0.573*** | 0.085 | 6.710  | ≤ 0.001 | 0.406   | 0.741  |
| creative–artistic SE   | —                     | school adjustment | −0.069   | 0.055 | −1.262 | 0.207   | −0.177  | 0.038  |
| emotional SE           | —                     | school adjustment | 0.579*** | 0.087 | 6.676  | ≤ 0.001 | 0.409   | 0.749  |
| Total indirect effects |                       |                   |          |       |        |         |         |        |
| school performance SE  | —                     | school adjustment | −0.046   | 0.047 | −0.978 | 0.328   | −0.137  | 0.046  |
| body related SE        | —                     | school adjustment | 0.011    | 0.035 | 0.319  | 0.750   | −0.057  | 0.080  |
| social SE              | —                     | school adjustment | 0.131*** | 0.040 | 3.254  | 0.001   | 0.052   | 0.210  |
| creative–artistic SE   | —                     | school adjustment | 0.002    | 0.021 | 0.081  | 0.935   | −0.040  | 0.043  |
| emotional SE           | —                     | school adjustment | 0.050*   | 0.025 | 1.962  | 0.050   | 0.00006 | 0.099  |
| Indirect effects       |                       |                   |          |       |        |         |         |        |
| school performance SE  | offline victimization | school adjustment | −0.082*  | 0.032 | −2.557 | 0.011   | −0.144  | −0.019 |
| school performance SE  | offline perpetration  | school adjustment | −0.015   | 0.018 | −0.862 | 0.389   | −0.050  | 0.020  |
| school performance SE  | cyber victimization   | school adjustment | 0.008    | 0.013 | 0.616  | 0.538   | −0.017  | 0.032  |
| school performance SE  | cyber perpetration    | school adjustment | 0.043    | 0.047 | 0.920  | 0.358   | −0.049  | 0.136  |
| body related SE        | offline victimization | school adjustment | 0.032    | 0.023 | 1.432  | 0.152   | −0.012  | 0.077  |
| body related SE        | offline perpetration  | school adjustment | 0.001    | 0.007 | 0.153  | 0.878   | −0.013  | 0.016  |

|                      |                       |                   |                |       |        |       |        |       |
|----------------------|-----------------------|-------------------|----------------|-------|--------|-------|--------|-------|
| body related SE      | cyber victimization   | school adjustment | 0.002          | 0.004 | 0.379  | 0.705 | -0.006 | 0.010 |
| body related SE      | cyber perpetration    | school adjustment | -0.024         | 0.033 | -0.735 | 0.462 | -0.088 | 0.040 |
| social SE            | offline victimization | school adjustment | <b>0.153**</b> | 0.055 | 2.787  | 0.005 | 0.045  | 0.260 |
| social SE            | offline perpetration  | school adjustment | -0.002         | 0.007 | -0.250 | 0.802 | -0.014 | 0.011 |
| social SE            | cyber victimization   | school adjustment | -0.022         | 0.035 | -0.642 | 0.521 | -0.091 | 0.046 |
| social SE            | cyber perpetration    | school adjustment | 0.003          | 0.013 | 0.205  | 0.837 | -0.023 | 0.028 |
| creative-artistic SE | offline victimization | school adjustment | -0.011         | 0.017 | -0.662 | 0.508 | -0.045 | 0.023 |
| creative-artistic SE | offline perpetration  | school adjustment | 0.006          | 0.008 | 0.788  | 0.430 | -0.009 | 0.021 |
| creative-artistic SE | cyber victimization   | school adjustment | -0.00002       | 0.003 | -0.007 | 0.994 | -0.006 | 0.006 |
| creative-artistic SE | cyber perpetration    | school adjustment | 0.007          | 0.015 | 0.486  | 0.627 | -0.022 | 0.037 |
| emotional SE         | offline victimization | school adjustment | 0.042          | 0.025 | 1.670  | 0.095 | -0.007 | 0.091 |
| emotional SE         | offline perpetration  | school adjustment | -0.006         | 0.009 | -0.606 | 0.545 | -0.024 | 0.012 |
| emotional SE         | cyber victimization   | school adjustment | -0.006         | 0.011 | -0.580 | 0.562 | -0.027 | 0.015 |
| emotional SE         | cyber perpetration    | school adjustment | 0.019          | 0.019 | 1.012  | 0.311 | -0.018 | 0.057 |

Note. SE = "self-esteem". Robust standard errors, robust confidence intervals, full information maximum likelihood estimator. Significant vales are displayed in bold. \*  $p \leq 0.05$ , \*\*  $p \leq 0.01$ , \*\*\*  $p \leq 0.001$ .

**Supplementary Table S3.** Standardized Total, Direct, Total Indirect and Indirect Effects of the Mediation Model.

| Predictors             | Mediator              | Outcome           | Estimate | SE    | z      | p       | 95% CI  |        |
|------------------------|-----------------------|-------------------|----------|-------|--------|---------|---------|--------|
|                        |                       |                   |          |       |        |         | Lower   | Upper  |
| Total effects          |                       |                   |          |       |        |         |         |        |
| school performance SE  | —                     | school adjustment | 0.125**  | 0.045 | 2.753  | 0.006   | 0.036   | 0.214  |
| body related SE        | —                     | school adjustment | 0.053    | 0.044 | 1.210  | 0.226   | −0.033  | 0.139  |
| social SE              | —                     | school adjustment | 0.469*** | 0.051 | 9.184  | ≤ 0.001 | 0.369   | 0.570  |
| creative-artistic SE   | —                     | school adjustment | −0.051   | 0.043 | −1.196 | 0.232   | −0.135  | 0.033  |
| emotional SE           | —                     | school adjustment | 0.418*** | 0.061 | 6.879  | ≤ 0.001 | 0.299   | 0.537  |
| Direct effects         |                       |                   |          |       |        |         |         |        |
| school performance SE  | —                     | school adjustment | 0.153*** | 0.046 | 3.342  | ≤ 0.001 | 0.063   | 0.243  |
| body related SE        | —                     | school adjustment | 0.045    | 0.040 | 1.128  | 0.259   | −0.034  | 0.124  |
| social SE              | —                     | school adjustment | 0.382*** | 0.057 | 6.710  | ≤ 0.001 | 0.270   | 0.493  |
| creative-artistic SE   | —                     | school adjustment | −0.052   | 0.041 | −1.262 | 0.207   | −0.134  | 0.029  |
| emotional SE           | —                     | school adjustment | 0.385*** | 0.058 | 6.676  | ≤ 0.001 | 0.272   | 0.498  |
| Total indirect effects |                       |                   |          |       |        |         |         |        |
| school performance SE  | —                     | school adjustment | −0.028   | 0.029 | −0.978 | 0.328   | −0.085  | 0.028  |
| body related SE        | —                     | school adjustment | 0.008    | 0.024 | 0.319  | 0.750   | −0.040  | 0.056  |
| social SE              | —                     | school adjustment | 0.088**  | 0.027 | 3.254  | 0.001   | 0.035   | 0.140  |
| creative-artistic SE   | —                     | school adjustment | 0.001    | 0.016 | 0.081  | 0.935   | −0.030  | 0.033  |
| emotional SE           | —                     | school adjustment | 0.033*   | 0.017 | 1.962  | 0.050   | 0.00004 | 0.066  |
| Indirect effects       |                       |                   |          |       |        |         |         |        |
| school performance SE  | offline victimization | school adjustment | −0.051*  | 0.020 | −2.557 | 0.011   | −0.089  | −0.012 |
| school performance SE  | offline perpetration  | school adjustment | −0.009   | 0.011 | −0.862 | 0.389   | −0.031  | 0.012  |
| school performance SE  | cyber victimization   | school adjustment | 0.005    | 0.008 | 0.616  | 0.538   | −0.010  | 0.020  |
| school performance SE  | cyber perpetration    | school adjustment | 0.027    | 0.029 | 0.920  | 0.358   | −0.030  | 0.084  |
| body related SE        | offline victimization | school adjustment | 0.023    | 0.016 | 1.432  | 0.152   | −0.008  | 0.054  |
| body related SE        | offline perpetration  | school adjustment | 0.0008   | 0.005 | 0.153  | 0.878   | −0.009  | 0.011  |
| body related SE        | cyber victimization   | school adjustment | 0.001    | 0.003 | 0.379  | 0.705   | −0.005  | 0.007  |
| body related SE        | cyber perpetration    | school adjustment | −0.017   | 0.023 | −0.735 | 0.462   | −0.061  | 0.028  |
| social SE              | offline victimization | school adjustment | 0.102**  | 0.036 | 2.787  | 0.005   | 0.030   | 0.173  |
| social SE              | offline perpetration  | school adjustment | −0.001   | 0.004 | −0.250 | 0.802   | −0.010  | 0.007  |
| social SE              | cyber victimization   | school adjustment | −0.015   | 0.023 | −0.642 | 0.521   | −0.060  | 0.031  |
| social SE              | cyber perpetration    | school adjustment | 0.002    | 0.009 | 0.205  | 0.837   | −0.015  | 0.019  |
| creative-artistic SE   | offline victimization | school adjustment | −0.009   | 0.013 | −0.662 | 0.508   | −0.034  | 0.017  |
| creative-artistic SE   | offline perpetration  | school adjustment | 0.004    | 0.006 | 0.788  | 0.430   | −0.007  | 0.016  |
| creative-artistic SE   | cyber victimization   | school adjustment | −0.00002 | 0.002 | −0.007 | 0.994   | −0.005  | 0.005  |
| creative-artistic SE   | cyber perpetration    | school adjustment | 0.005    | 0.011 | 0.486  | 0.627   | −0.017  | 0.028  |
| emotional SE           | offline victimization | school adjustment | 0.028    | 0.017 | 1.670  | 0.095   | −0.005  | 0.061  |

|              |                      |                   |        |       |        |       |        |       |
|--------------|----------------------|-------------------|--------|-------|--------|-------|--------|-------|
| emotional SE | offline perpetration | school adjustment | -0.004 | 0.006 | -0.606 | 0.545 | -0.016 | 0.008 |
| emotional SE | cyber victimization  | school adjustment | -0.004 | 0.007 | -0.580 | 0.562 | -0.018 | 0.010 |
| emotional SE | cyber perpetration   | school adjustment | 0.013  | 0.013 | 1.012  | 0.311 | -0.012 | 0.038 |

*Note.* SE = "self-esteem". Robust standard errors, robust confidence intervals, full information maximum likelihood estimator. Significant vales are displayed in bold. \*  $p \leq 0.05$ , \*\*  $p \leq 0.01$ , \*\*\*  $p \leq 0.001$ .
